# Supplementary material
Source: Springer Nature journal article supplement (https://www.springermedizin.de/resource/supplementary/13075_2013_4154_MOESM3_ESM.pdf/9696212)

Treated (Arthritic) rat

Non-treated (control)

Iba1

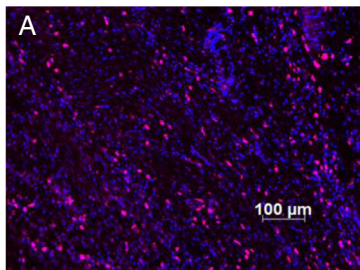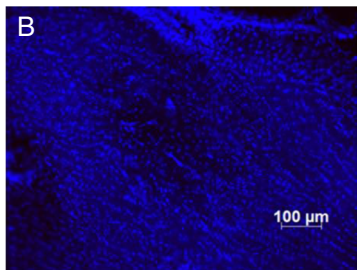

CD68

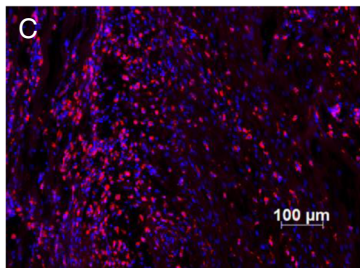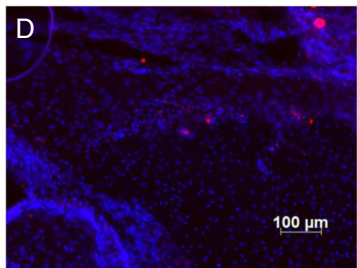

TSPO + CD68

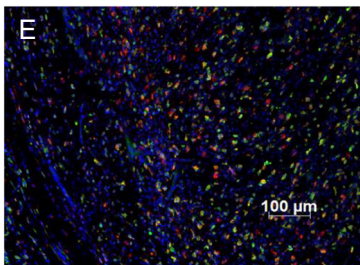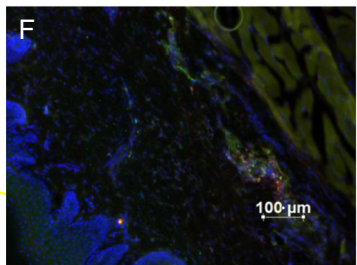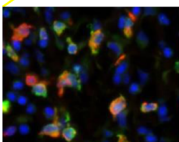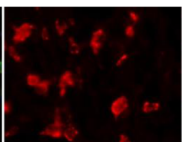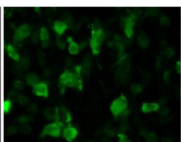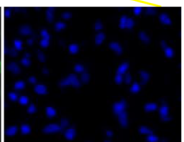

MERGE

CD68

TSPO

DAPI

Supplement: MOESM3 [file 9696212]
